# Supplementary material for: An Insight into the Bicarbonate Effect in Photosystem II through the Prism of the JIP Test
Source: MDPI journal article supplement (doi:10.3390/photochem2030050), 2022-09-15
Supplement: s1 [file s1]

Archive with 1 entries (1 files):
- photochem-1891130-supplementary.pdf
